# Supplementary material for: Cost-Effectiveness of Telemedicine in Remote Orthopedic Consultations: Randomized Controlled Trial
Source: PubMed Central journal article supplement (PMC6399572; doi:10.2196/11330), 2019-02-19
Supplement: jmir_v21i2e11330_app1.pdf [file jmir_v21i2e11330_app1.pdf]

Supplementary Table 6 Calculation of patients cost for videoconferencing and standard consultations (in Norwegian krone and Euro<sup>a</sup>)

|                                                                       | n          | Mean distance/<br>number/time | UNN<br>Fare price/<br>unite price,<br>NOK | Total<br>costs | Total costs per<br>patient | n          | Mean distance<br>/time | RMC<br>Fare price/<br>unite price,<br>NOK | Total Costs    | Total costs<br>per patient |
|-----------------------------------------------------------------------|------------|-------------------------------|-------------------------------------------|----------------|----------------------------|------------|------------------------|-------------------------------------------|----------------|----------------------------|
|                                                                       | 257        |                               |                                           |                |                            | 302        |                        |                                           |                |                            |
| <b>Travel costs without companion</b>                                 | <b>184</b> |                               |                                           |                |                            | <b>223</b> |                        |                                           |                |                            |
| Using standard rate <sup>b</sup>                                      | 114        | x 144km <sup>c</sup>          | x 2.40 x 2                                | 78,797         |                            | 143        | x 44km <sup>c</sup>    | x 2.40 x 2                                | 30,202         |                            |
| Extra transport – private car                                         | 12         | x 254km <sup>d</sup>          | x 2.40 x 2                                | 14,630         |                            | 28         | x 45km <sup>d</sup>    | x 2.40 x 2                                | 6,048          |                            |
| Taxi –round trip                                                      | 35         | x 227km <sup>e</sup>          | x 12.50 <sup>f</sup>                      | 99,313         |                            | 52         | x 52km <sup>e</sup>    | x 16.50 <sup>f</sup>                      | 44,616         |                            |
| Taxi- waiting                                                         |            | x 4 h                         | x 190 <sup>f</sup>                        | 26,600         |                            |            | x 1 h                  | x 253 <sup>f</sup>                        | 13,156         |                            |
| Airplane                                                              | 2          |                               | x 713 x2                                  | 2,852          |                            |            |                        |                                           |                |                            |
| Express boat                                                          | 21         |                               | x 430 x 2                                 | 18,060         |                            |            |                        |                                           |                |                            |
| Overnight stay; >12 h <sup>g</sup>                                    | 10         |                               | x 220                                     | 2,200          |                            | 2          |                        | x 220                                     | 440            |                            |
| <b>Travel costs with companion</b>                                    | <b>73</b>  |                               |                                           |                |                            | <b>79</b>  |                        |                                           |                |                            |
| Using standard rate <sup>b</sup>                                      | 38         | x 151km                       | x 2,40 x 2                                | 27,542         |                            | 59         | x 45km <sup>c</sup>    | x 2.40 x 2                                | 12,744         |                            |
| Extra transport – private car <sup>b</sup>                            | 4          | x 275km <sup>c</sup>          | x 2.40 x 2                                | 5,280          |                            | 12         | x 46km                 | x 2.40 x 2                                | 2,650          |                            |
| Bus                                                                   | 13         |                               |                                           |                |                            |            |                        |                                           |                |                            |
| Kvæningen                                                             | 4          | x 212km <sup>c</sup>          | x 2.40 x 4                                | 8,141          |                            |            |                        |                                           |                |                            |
| Nordreisa                                                             | 7          | x 140km <sup>c</sup>          | x 2.40 x 4                                | 9,408          |                            |            |                        |                                           |                |                            |
| Skjervøy                                                              | 1          | x 160km <sup>c</sup>          | x 2.40 x 4                                | 1,536          |                            |            |                        |                                           |                |                            |
| Kåfjord                                                               | 1          | x 113km <sup>c</sup>          | x 2.40 x 4                                | 1,085          |                            |            |                        |                                           |                |                            |
| Taxi – round trip                                                     | 12         | x 226km <sup>e</sup>          | x 16.50 <sup>f</sup>                      | 44,748         |                            | 8          | x 46km                 | x 16.50 <sup>f</sup>                      | 6,072          |                            |
| Taxi - waiting                                                        |            | x 4 h                         | x 253 <sup>f</sup>                        | 12,144         |                            |            | x 1 h                  | x 253 <sup>f</sup>                        | 2,024          |                            |
| Airplane                                                              | 1          |                               | x 713 x 4                                 | 2,852          |                            |            |                        |                                           |                |                            |
| Express boat                                                          | 5          |                               | x 430 x 4                                 | 8,600          |                            |            |                        |                                           |                |                            |
| Overnight stay; >12 h <sup>g</sup>                                    | 7          |                               | x 220 x 2                                 | 3,080          |                            |            |                        |                                           |                |                            |
| <b>Total travel costs, NOK(€)</b>                                     |            |                               |                                           | <b>366,868</b> | <b>1,427 (148.65)</b>      |            |                        |                                           | <b>117,952</b> | <b>391 (40.73)</b>         |
| Patient's charge for the journey, NOK(€)                              |            |                               | 149 x 2                                   |                | 298(31.04)                 |            |                        | 149 x 2                                   |                | 298(31.04)                 |
| <b>Total travel cost health system, NOK(€)</b>                        |            |                               |                                           |                | <b>1,129 (117.60)</b>      |            |                        |                                           |                | <b>93(9.69)</b>            |
| <b>Time costs</b>                                                     |            |                               |                                           |                |                            |            |                        |                                           |                |                            |
| Lost working hours - full time <sup>h</sup>                           | 20         | x 8h                          | x 380 <sup>i</sup>                        | 60,800         |                            | 36         | x 0.93h x 2            | x 380 <sup>i</sup>                        | 25,445         |                            |
| Lost working hours - part time <sup>h</sup>                           | 15         | x 4h                          | x 380                                     | 22,800         |                            | 13         | x 0.65h x 2            | x 380                                     | 6,422          |                            |
| <b>Lost working hours total, NOK(€)</b>                               |            |                               |                                           | <b>83,600</b>  | <b>325 (33.85)</b>         |            |                        |                                           | <b>31,867</b>  | <b>106 (11.04)</b>         |
| <b>Total travel costs and lost working hours for society, NOK (€)</b> |            |                               |                                           |                | <b>1,752 (182.50)</b>      |            |                        |                                           |                | <b>497 (51.77)</b>         |

UNN – University Hospital, standard consultation; RMC – Regional medical center, remote location; n= number of traveling to consultation, missing value is replaced with lowest estimated value/distance/time according to travel-distance.

<sup>a</sup> 1 Euro = 9.60 Norwegian krone (NOK), Exchange rate from the Norwegian Bank on April 10<sup>th</sup>2018

<sup>b</sup> Standard rate refunded 2.40 NOK per kilometer according to Pasientreiser HF (the National Patients Transport) for 2018. Non responder is included as standard rate refunded

<sup>c</sup> Mean distance (the shortest distance)

<sup>d</sup> Mean distance (patient reported distance)

<sup>e</sup> Mean distance (the shortest and fastest - no ferry)

<sup>f</sup> Adjusted for estimated number of patient in the same taxi, reported from the UNN's Patient Travelling Agency

<sup>g</sup> Stay overnight, refunding 220 NOK (undocumented) subsistence allowance,

<sup>h</sup> Directly waiting time before consultation and consultant time is not included. The difference between the location in pre-consultation waiting time is small (7 minute longer at UNN, p-value <0.001). There was no significant difference in mean consultation time (20.9 and 20.5 minutes)

<sup>i</sup> Average income all sectors per hour, 150 hours per week, 2017 + 30% social taxes according: <https://www.ssb.no/en/arbeid-og-lonn/statistikker/lonnansatt>
